# Supplementary material for: COPD Patients Exhibit Distinct Gene Expression, Accelerated Cellular Aging, and Bias to M2 Macrophages
Source: MDPI journal article supplement (doi:10.3390/ijms24129913), 2023-06-08
Supplement: s1 [file s1]

## Supplementary material

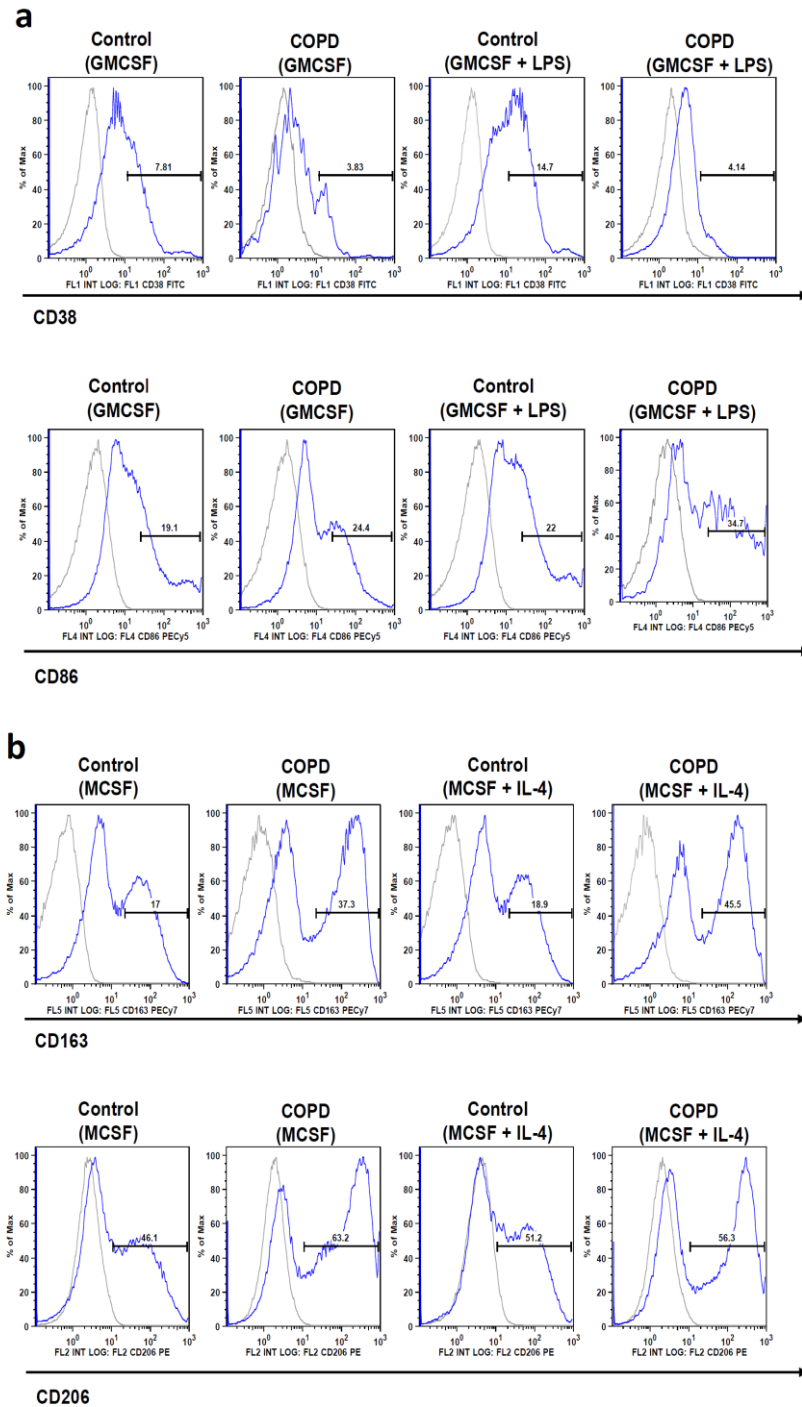

**Figure S1.** Representative histograms of positive cells for CD38 or CD86 (**a**) and CD163 or CD206 (**b**) in cultured macrophages (with GMCSF or MCSF) derived from peripheral blood monocytes in non-smoking controls ( $n = 10$ ) and COPD patients ( $n = 16$ ), stimulated or not with LPS (A) or IL-4 (B), by flow cytometry. Blue lines indicate antibody-labelled cells and gray lines indicate unlabeled cells.

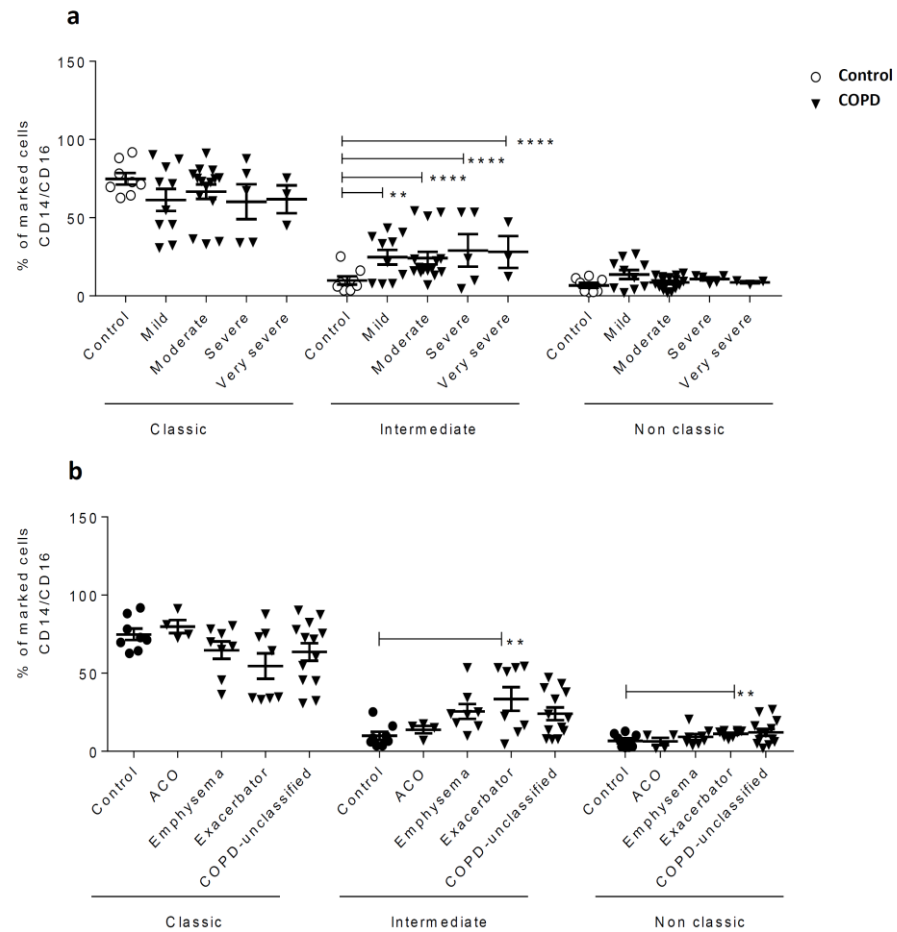

**Figure S2.** Subtypes of classical monocytes (CD14<sup>++</sup>/CD16<sup>-</sup>), intermediate monocytes (CD14<sup>+</sup>/CD16<sup>+</sup>) and non-classical monocytes (CD14<sup>+</sup>/CD16<sup>++</sup>) were determined by flow cytometry in non-smoking controls and COPD patients with different: **(A)** graveness (mild,  $n = 10$ ; moderate,  $n = 15$ ; severe,  $n = 6$  and very severe,  $n = 4$ ); and **(B)** phenotypes (ACO,  $n = 4$ ; emphysema,  $n = 10$ ; exacerbator,  $n = 8$  and COPD- unclassified ( $n = 13$ )). Statistics were performed using one-way analysis of variance (ANOVA), followed by a Bonferroni test. Black circles represent healthy controls and black triangles represent COPD patients. Data represent mean  $\pm$  standard error of mean. Significance of p-values: \*\*  $p < 0.01$  e \* \*\*\*  $p < 0.0001$  compared to control.

## Materials and Methods

### *Characterization of the Peripheral Blood Monocytes Profile*

Whole peripheral blood (100  $\mu$ L) was incubated with 5  $\mu$ L of anti-CD14-FITC, anti-CD16-PE and anti-HLDR-PC5 antibodies (Beckman Coulter, California, USA) for 10 minutes in the dark. Then, 2 mL of red blood cell lysis buffer (BD Biosciences, Franklin Lakes, NJ, USA) were added for 10 minutes; tubes were centrifuged at 1700 *rpm* for 5 min at 20 °C; the supernatant was discarded and the pellet resuspended in PBS1x. After further centrifugation for 5 min, the cell pellet was resuspended in 500  $\mu$ L of PBS1x with formalin (1%) to fix the cells. The acquisition was performed using a FACS Calibur cytometer (BD Biosciences, Franklin Lakes, NJ, USA), obtaining 200,000 events. Lymphocytes were excluded due to the absence of CD14; NK cells and neutrophils were excluded due to the lack of HLA-DR. Data were analyzed using the Kaluza v5 (Beckman Coulter, California, USA). The results were expressed in individual values (%). Compensation was performed using single-color fluorochrome antibodies for PE and FITC, respectively.
